# Supplementary material
Source: PubMed Central journal article supplement (PMC10348699)
Supplement: NIHMS1835288-supplement-Supplemental_Material.pdf [file NIHMS1835288-supplement-Supplemental_Material.pdf]

## Supplemental Table 1

### *Comparison of Program Characteristics and Protocols*

| <b>Program Characteristics</b> | <b>Program One</b>                                                                                                                                                                                                   | <b>Program Two</b>                                                                                                                                                                                            |
|--------------------------------|----------------------------------------------------------------------------------------------------------------------------------------------------------------------------------------------------------------------|---------------------------------------------------------------------------------------------------------------------------------------------------------------------------------------------------------------|
| Time Period                    | 2009-2016                                                                                                                                                                                                            | 2015-2019                                                                                                                                                                                                     |
| Clinic Population Size         | 375 - 475                                                                                                                                                                                                            | 500                                                                                                                                                                                                           |
| Staffing                       | 1 full-time doctoral level psychology trainee<br><br>1 part-time doctoral level psychology trainee<br><br>1 supervising pediatric psychologist                                                                       | 1 full-time pediatric psychologist<br><br>1 part-time predoctoral intern or post-doctoral psychology fellow (20% effort)                                                                                      |
| Target Ages                    | 2 years and 4 years                                                                                                                                                                                                  | 9-, 18-, 24- or 30-months, annually at ages 3, 4, and 5                                                                                                                                                       |
| Protocol                       | Brief Clinical Interview<br><br><b>2 years:</b> <i>Ages and Stages Questionnaire, Second Edition (ASQ-2)</i><br><br><b>4 years:</b> <i>Ages and Stages Questionnaire, Second Edition (ASQ-2); Fluharty Preschool</i> | Brief Clinical Interview<br><br><b>All Ages:</b> <i>Ages and Stages Questionnaire, Third Edition (ASQ-3); Ages and Stages Questionnaire – Social Emotional, First or Second Edition (ASQ-SE or ASQ-SE 2);</i> |

Developmental Screening in SCD

|                        |                                                                                                                               |                                                                                                                                                                                                                                                                                                                             |
|------------------------|-------------------------------------------------------------------------------------------------------------------------------|-----------------------------------------------------------------------------------------------------------------------------------------------------------------------------------------------------------------------------------------------------------------------------------------------------------------------------|
|                        | <p><i>Speech and Language Screening Test, Second Edition (Fluharty-2), Articulation and Syntactic Processing Subtests</i></p> | <p><i>Coplan &amp; Gleason (1988) method for articulation concerns</i></p> <p><b>Ages 16-30 months: Modified Checklist for Autism – Revised/Follow-Up (M-CHAT-R/F)</b></p> <p><u>Risk Stratification:</u></p> <p>Child with medical risks or parent concerns for a neurodevelopmental disorder referred for evaluation.</p> |
| <p>Financial Model</p> | <p>Philanthropic funding</p>                                                                                                  | <p>Fee-for-service</p>                                                                                                                                                                                                                                                                                                      |

*Note.* Psychologists in both programs completed developmental screenings as one clinical service among several others. In Program Two, salary coverage for the psychologist was provided by a range of clinical services as well as teaching and research support (ranging from 15 – 39% during specific years).

**Supplemental Table 2**

*Billing Information and Resources*

| <b>Service Description</b>                                                                                                     | <b>Potential Billing Considerations</b>                                                                                                                                                                                                                                                                                                                         |
|--------------------------------------------------------------------------------------------------------------------------------|-----------------------------------------------------------------------------------------------------------------------------------------------------------------------------------------------------------------------------------------------------------------------------------------------------------------------------------------------------------------|
| Interview, behavioral observations, recommendations, and documentation                                                         | Health and behavior assessment (96156) or<br>Psychiatric diagnostic interview (90791) or<br>Neurobehavioral status exam (96116/96121)                                                                                                                                                                                                                           |
| Developmental screening instrument with scoring and documentation, per standardized instrument (e.g., ASQ-2/3)                 | Developmental screening (96110)                                                                                                                                                                                                                                                                                                                                 |
| Social-emotional screening instrument with scoring and documentation, per standardized instrument (e.g., ASQ-SE 2, M-CHAT-R/F) | Developmental screening (96110) or<br>Behavioral screening (96127)                                                                                                                                                                                                                                                                                              |
| Developmental testing, with interpretation and report (e.g., Fluharty-2)                                                       | Developmental test administration and evaluation (96112/96113)                                                                                                                                                                                                                                                                                                  |
| Recommended Resources                                                                                                          | American Psychological Association:<br><a href="https://www.apaservices.org/practice/reimbursement/health-codes/testing/billing-coding">https://www.apaservices.org/practice/reimbursement/health-codes/testing/billing-coding</a><br><br>American Academy of Pediatrics:<br><br>Lipkin, et al. (2020) – See Supplemental Information with billing descriptions |

*Note.* Please consult with your institution’s compliance officers to discuss your planned clinical services and to discuss appropriate billing and documentation.

Developmental Screening in SCD

**Supplemental Figure 1**

*Program One Outcomes Flowchart*

Developmental Screening in SCD

**Supplemental Figure 2**

*Program Two Outcomes Flowchart*
