# Supplementary material
Source: PubMed Central journal article supplement (PMC10348699)
Supplement: NIHMS1835288-supplement-supplementary_figures_1___2.pdf [file NIHMS1835288-supplement-supplementary_figures_1___2.pdf]

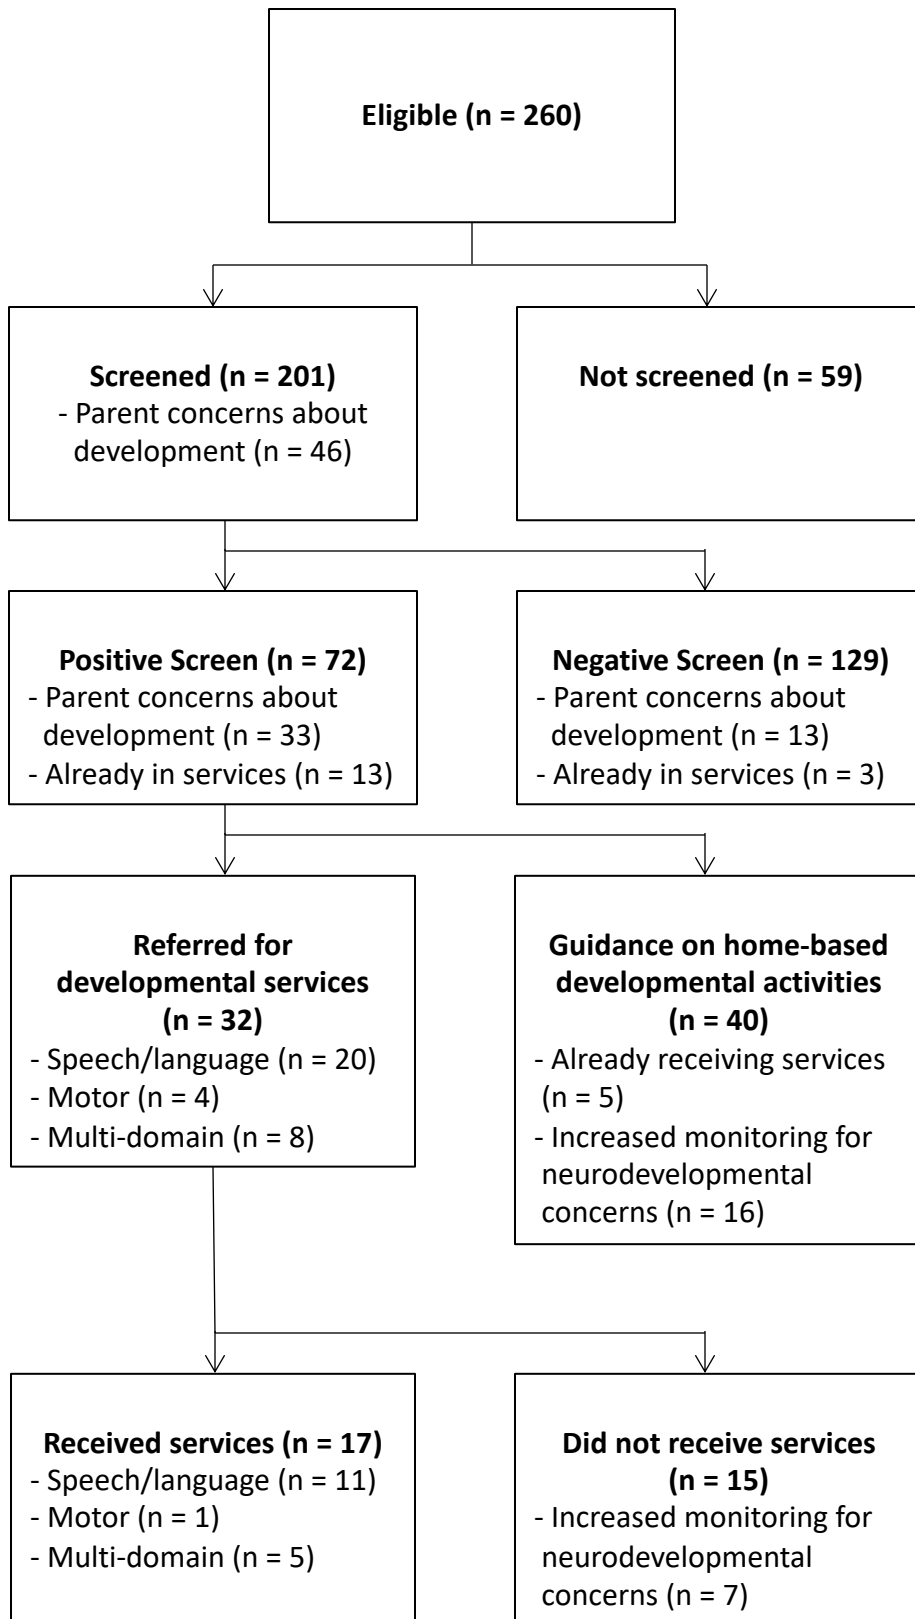

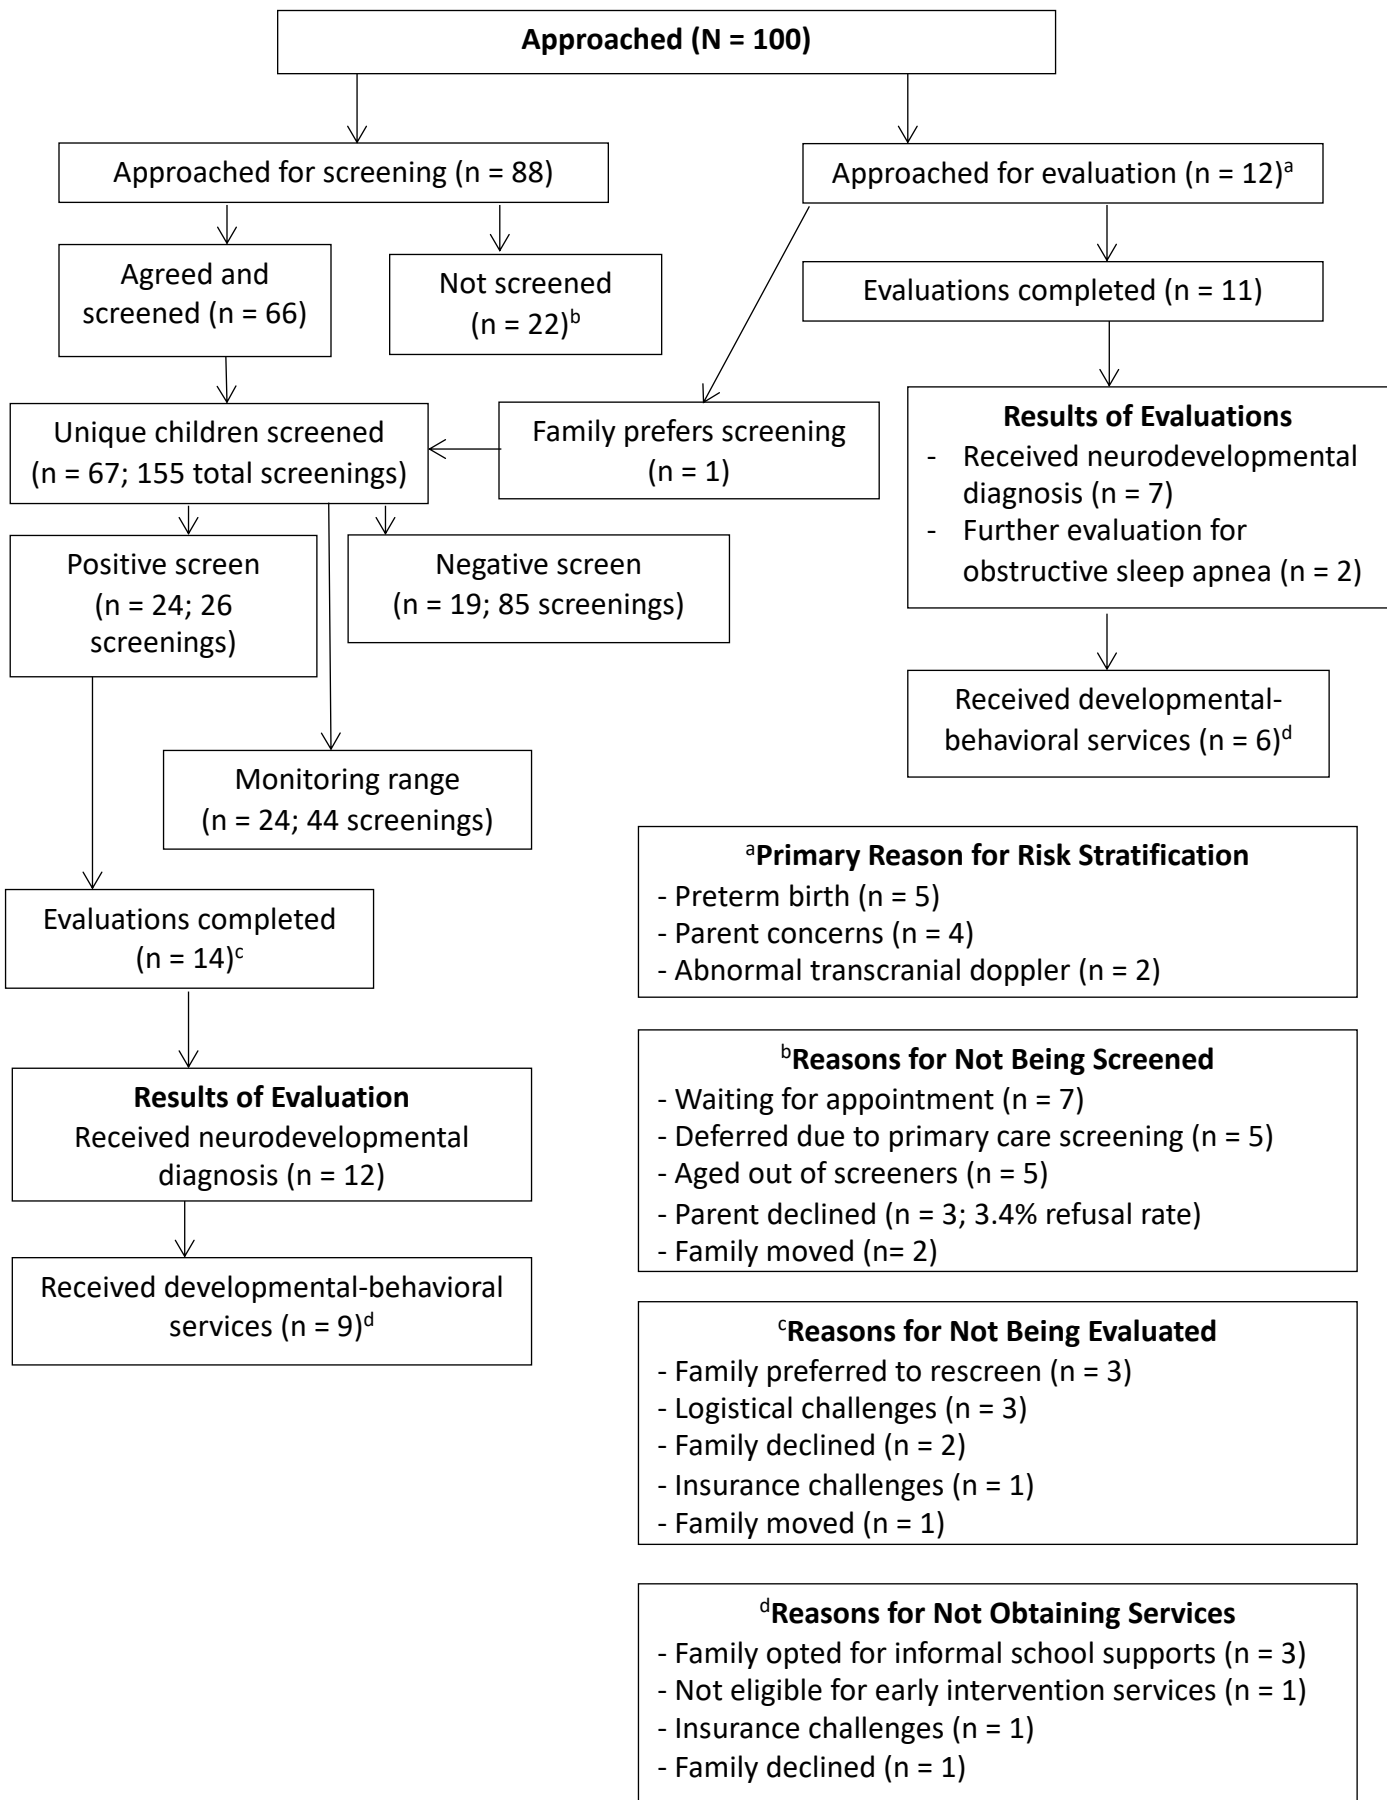

**<sup>a</sup>Primary Reason for Risk Stratification**

- Preterm birth (n = 5)
- Parent concerns (n = 4)
- Abnormal transcranial doppler (n = 2)

**<sup>b</sup>Reasons for Not Being Screened**

- Waiting for appointment (n = 7)
- Deferred due to primary care screening (n = 5)
- Aged out of screeners (n = 5)
- Parent declined (n = 3; 3.4% refusal rate)
- Family moved (n = 2)

**<sup>c</sup>Reasons for Not Being Evaluated**

- Family preferred to rescreen (n = 3)
- Logistical challenges (n = 3)
- Family declined (n = 2)
- Insurance challenges (n = 1)
- Family moved (n = 1)

**<sup>d</sup>Reasons for Not Obtaining Services**

- Family opted for informal school supports (n = 3)
- Not eligible for early intervention services (n = 1)
- Insurance challenges (n = 1)
- Family declined (n = 1)
